# Supplementary material
Source: HighWire-hosted journal article supplement (https://bjgp.org/highwire/filestream/27634/field_highwire_adjunct_files/0/bjpg57-650TableS1.pdf)
Supplement: bjpg57-650TableS1.pdf [file bjpg57-650TableS1.pdf]

**Supplementary Table 1. Sensitivity, specificity and likelihood ratios at various cut off-points of the PHQ-9 and CORE instruments.**

| Cut off            | Sensitivity,%<br>95% CI | Specificity, %<br>95% CI | LR+<br>95% CI            | LR-<br>95% CI           | Area under<br>the curve |
|--------------------|-------------------------|--------------------------|--------------------------|-------------------------|-------------------------|
| PHQ-9              |                         |                          |                          |                         | 0.94 (0.89 to 0.98)     |
| ≥9                 | 94.4<br>0.813 to 0.993  | 73.3<br>0.603 to 0.839   | 3.542<br>2.311 to 5.428  | 0.076<br>0.020 to 0.294 |                         |
| ≥10                | 91.7<br>0.775 to 0.982  | 78.3<br>0.658 to 0.879   | 4.231<br>2.589 to 6.914  | 0.106<br>0.036 to 0.317 |                         |
| ≥11                | 91.7<br>0.775 to 0.982  | 81.7<br>0.696 to 0.905   | 5.000<br>2.905 to 8.606  | 0.102<br>0.034 to 0.304 |                         |
| ≥12                | 91.7<br>0.775 to 0.982  | 85.0<br>0.734 to 0.929   | 6.111<br>3.319 to 11.251 | 0.098<br>0.033 to 0.291 |                         |
| ≥13                | 88.9<br>0.739 to 0.969  | 86.7<br>0.754 to 0.941   | 6.667<br>3.462 to 12.839 | 0.128<br>0.051 to 0.325 |                         |
| CORE-OM clinical   |                         |                          |                          |                         | 0.92 (0.87 to 0.97)     |
| ≥12                | 91.7<br>0.775 to 0.982  | 71.7<br>0.586 to 0.825   | 3.235<br>2.138 to 4.896  | 0.116<br>0.039 to 0.348 |                         |
| ≥13                | 91.7<br>0.775 to 0.982  | 76.7<br>0.640 to 0.866   | 3.929<br>2.458 to 6.280  | 0.109<br>0.036 to 0.324 |                         |
| ≥14                | 88.9<br>0.739 to 0.969  | 80.0<br>0.677 to 0.892   | 4.444<br>2.645 to 7.469  | 0.139<br>0.055 to 0.353 |                         |
| ≥15                | 83.3<br>0.672 to 0.936  | 83.3<br>0.696 to 0.905   | 4.545<br>2.613 to 7.907  | 0.204<br>0.097 to 0.428 |                         |
| ≥16                | 75.0<br>0.578 to 0.879  | 85.0<br>0.734 to 0.929   | 5.000<br>2.660 to 9.399  | 0.294<br>0.165 to 0.523 |                         |
| CORE-OM depression |                         |                          |                          |                         | 0.92 (0.86 to 0.97)     |
| ≥17                | 94.4<br>0.813 to 0.993  | 78.3<br>0.658 to 0.879   | 4.359<br>2.677 to 7.098  | 0.071<br>0.018 to 0.275 |                         |
| ≥18                | 88.9<br>0.739 to 0.969  | 81.7<br>0.696 to 0.905   | 4.848<br>2.807 to 8.373  | 0.136<br>0.054 to 0.345 |                         |
| ≥19                | 88.9<br>0.739 to 0.969  | 81.7<br>0.696 to 0.905   | 4.848<br>2.807 to 8.373  | 0.136<br>0.054 to 0.345 |                         |
| ≥20                | 88.9<br>0.739 to 0.969  | 81.7<br>0.696 to 0.905   | 4.848<br>2.807 to 8.373  | 0.136<br>0.054 to 0.345 |                         |
| ≥21                | 83.3<br>0.672 to 0.936  | 85.0<br>0.734 to 0.929   | 5.556<br>2.989 to 10.325 | 0.196<br>0.094 to 0.410 |                         |
| ≥22                | 83.3<br>0.672 to 0.936  | 85.0<br>0.734 to 0.929   | 5.556<br>2.989 to 10.325 | 0.196<br>0.094 to 0.410 |                         |

Data from 96 patients, of whom 36 scored positive for Major Depressive Disorder on the Structured Clinical Interview for DSM (SCID). PHQ-9 = Patient Health Questionnaire. CORE-OM = Clinical Outcomes in Routine Evaluation – Outcome Measure.
